# Supplementary material for: Natural defense against multi-drug resistant Pseudomonas aeruginosa: Cassia occidentalis L. in vitro and in silico antibacterial activity
Source: Royal Society of Chemistry journal article supplement (doi:10.1039/d3ra03923d), 2023-01-01
Supplement: d3ra03923d1.pdf [file d3ra03923d1.pdf]

*Supplementary file on*

**Natural defense against multi-drug resistant *Pseudomonas aeruginosa*: *Cassia occidentalis* L. *in vitro* and *in silico* antibacterial activity**

Raihan Rahman Imon<sup>1</sup>, Md. Enamul Kabir Talukder<sup>1</sup>, Shahina Akhter<sup>2</sup>, Md. Saidul Islam<sup>3</sup>, Foysal Ahammad<sup>4, 5</sup>, K. M. Anis-Ul-Haque<sup>6</sup>, Md. Moniruzzaman<sup>7</sup>, Mirola Afroze<sup>7</sup>, Mala Khan<sup>7</sup>, Mohammad Abu Hena Mostofa Jamal<sup>8</sup>, Tanveer A. Wani<sup>9</sup>, Mohammad Jashim Uddin<sup>10\*</sup>, Md. Mashiar Rahman<sup>1, \*</sup>

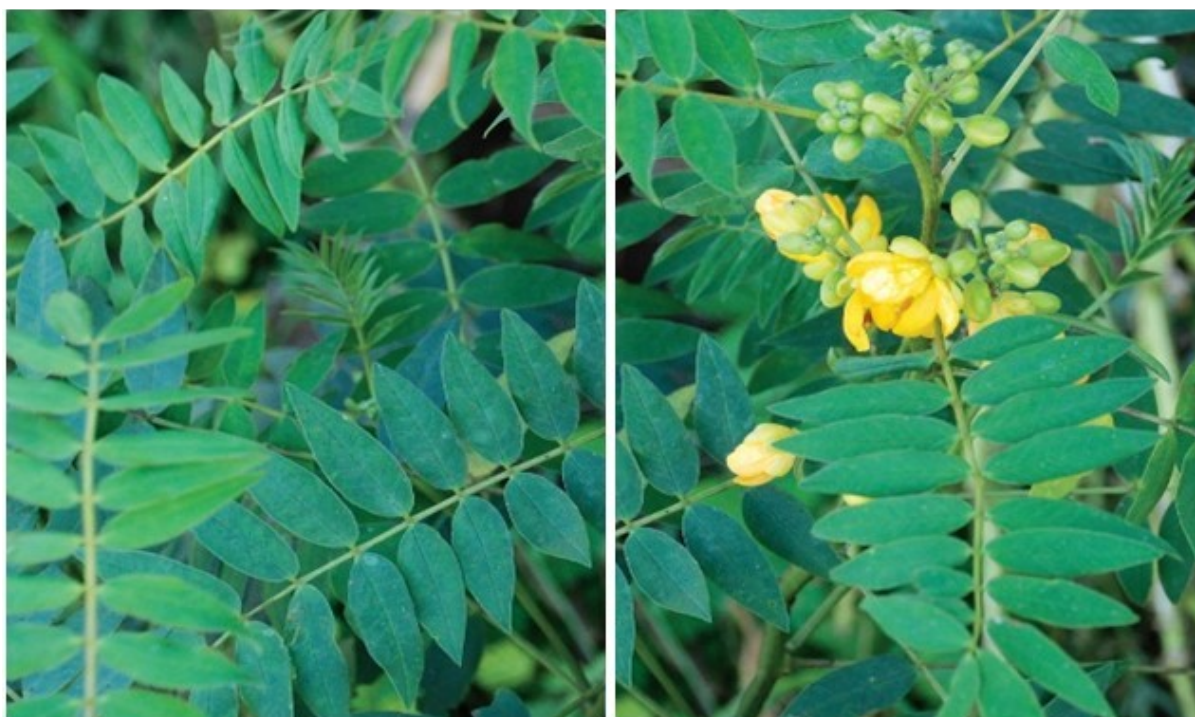

*Cassia occidentalis* L. before flowering

*Cassia occidentalis* L. after flowering

**Figure S1.** Illustrates the morphological changes in *Cassia occidentalis* L. before and after flowering. The images showcase the distinct characteristics of the plant at two different stages, allowing for a visual comparison of its appearance during the pre-flowering and post-flowering phases.

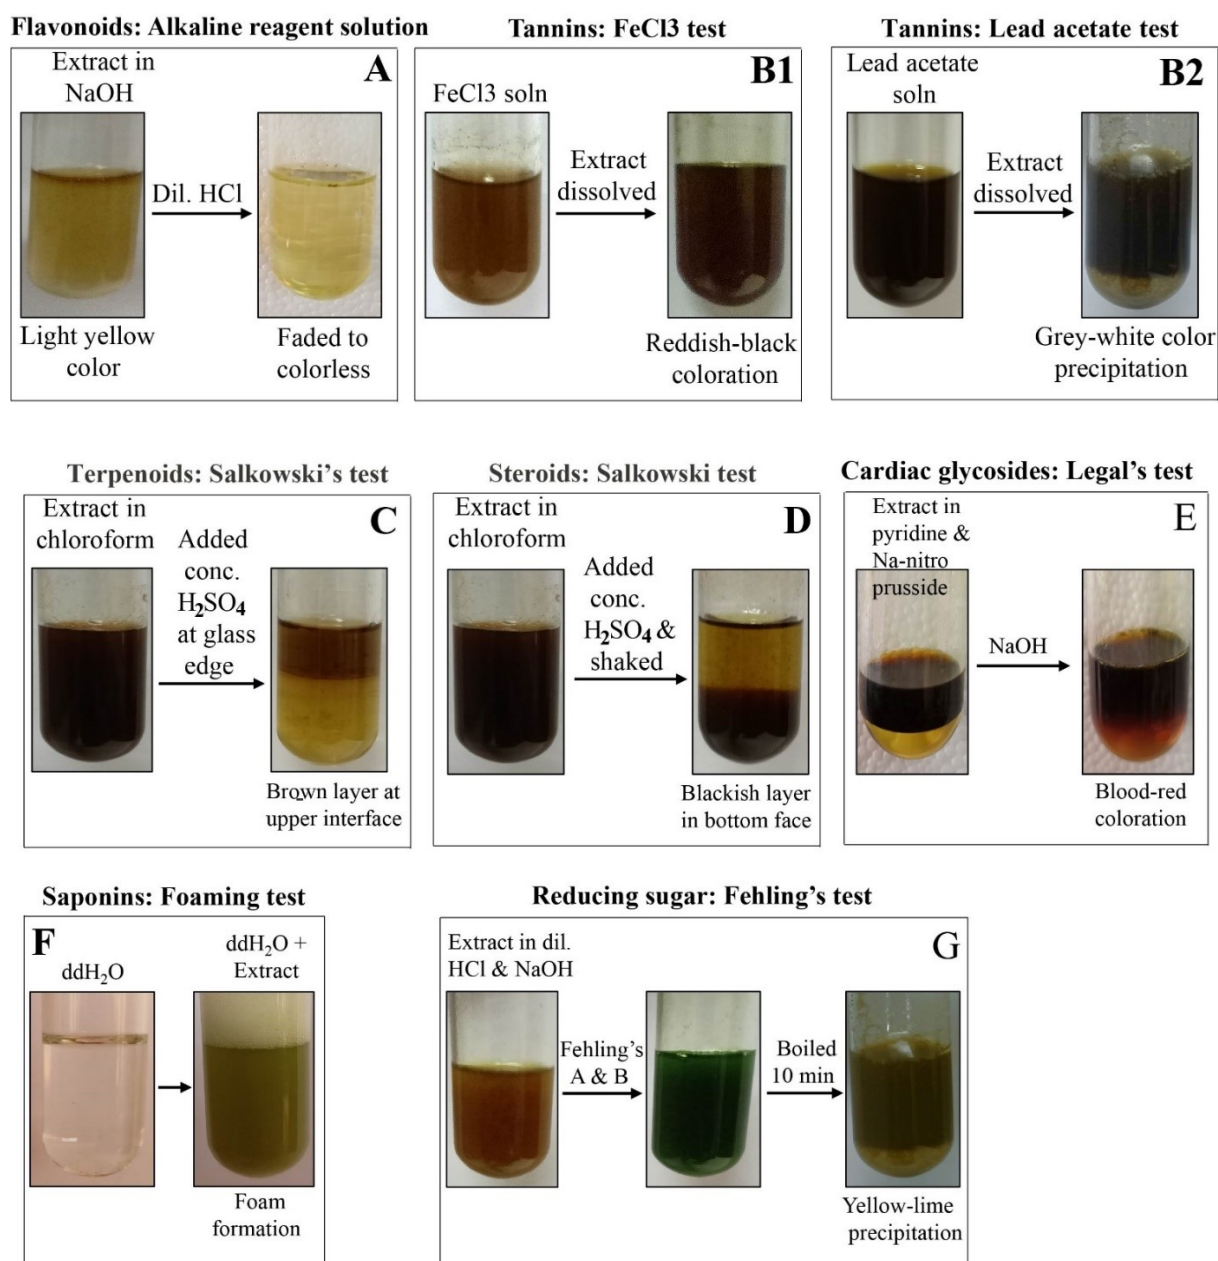

**Figure S2.** Displays the results of the preliminary phytochemical screening of *C. occidentalis* L. leaves extracts, achieved through color change experiments. The different panels represent the specific tests conducted to identify various phytochemical classes in the plant extract: (A) Alkaline reagent test for flavonoids, (B1) FeCl<sub>3</sub> test for tannins, (B2) Lead acetate test for tannins, (C) Salkowski's test for terpenoids, (D) Salkowski's test for steroids, (E) Legal's test for cardiac glycosides, (F) Foaming test for saponins, and (G) Fehling's test for reducing sugar.

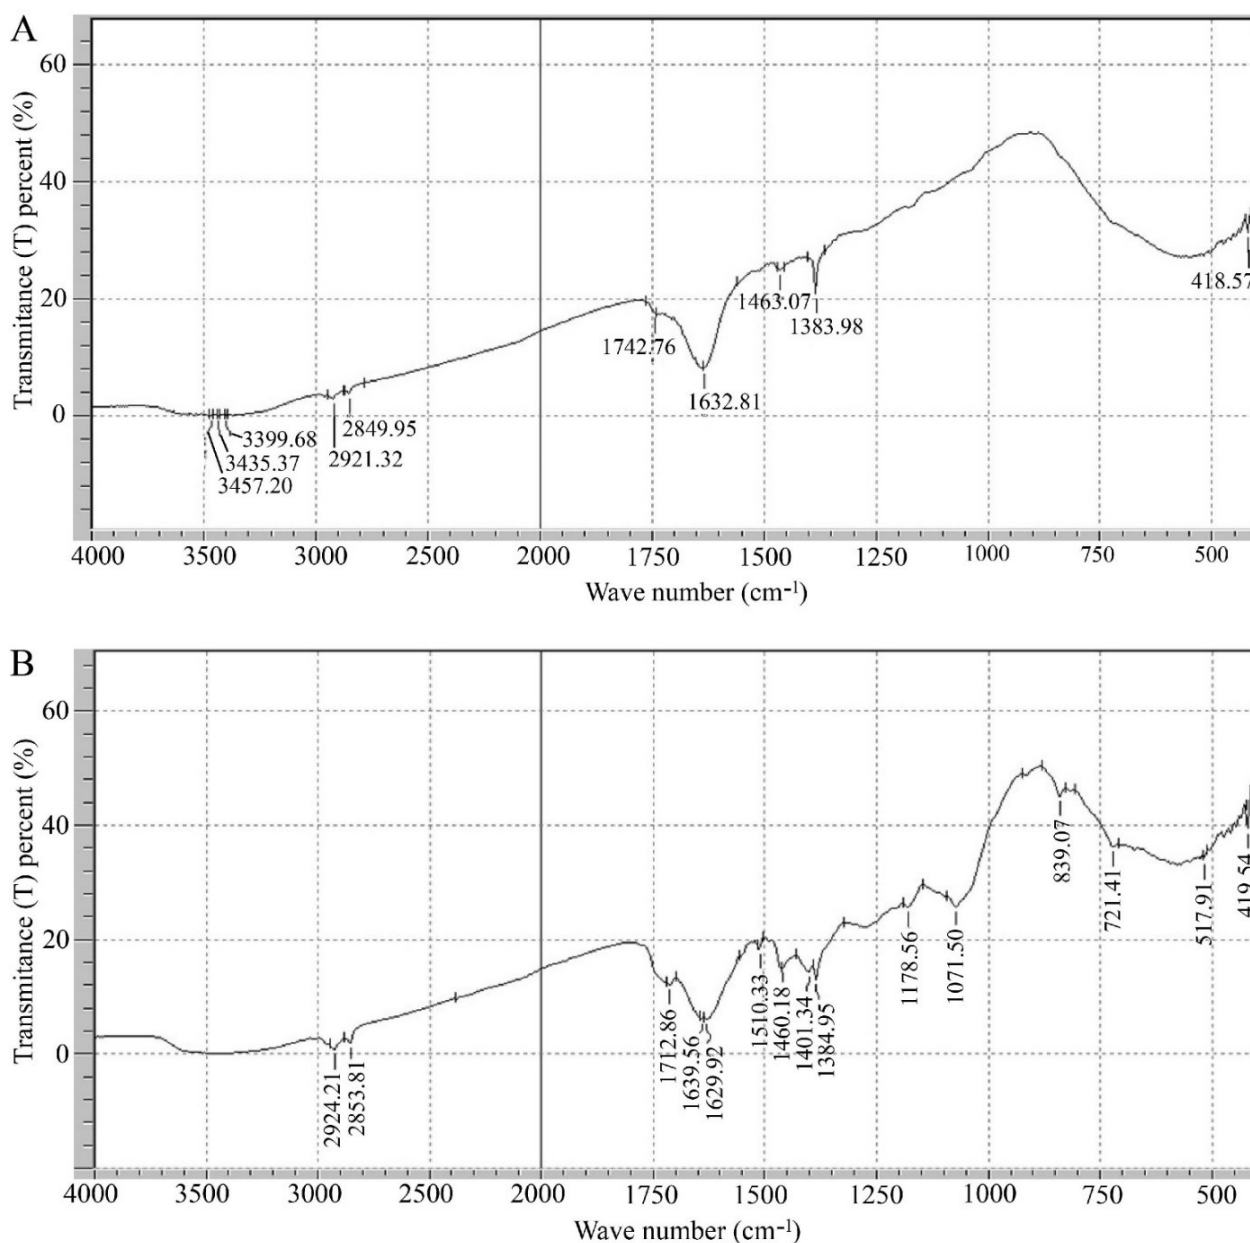

**Figure S3.** Fourier transform-infrared spectra (FT-IR) of MECOL and EAECOL. (A) Peaks at 3700-3000 and 1178.56, 2921.32, 2849.95, 1742.76, 1632.81, 1463.07-1383.96, and 418.57  $\text{cm}^{-1}$  indicate the presence of corresponding functional groups in MECOL: carboxylic acids (O-H stretch), aliphatic hydrocarbons (C-H stretch), aldehydes (C-H stretch), aldehydes/esters (C=O stretch), alkenes (C=C stretch), alkanes ((-CH<sub>3</sub>- bend), and alkyl halides (C-X). (B) Peaks at 3700-3000 and 1178.56, 2924.21, 2853.81, 1712.86, 1639.56, 1629.92, 1510.33, 1460.18, and 1384.95, 1401.34 and 839.07, 1071.50, 839.07, 721.41, 517.91-419.57  $\text{cm}^{-1}$ , denote the existence of respective functional groups in EAECOL: carboxylic acids (O-H stretch), aliphatic hydrocarbons (C-H stretch), aldehydes (C-H stretch), aldehyde/ketone (C=O stretch), alkene (C=C stretch), primary or secondary amine (N-H bend), nitro (N=O stretch),

alkane (-CH<sub>3</sub>- bend), aldehyde/alkane (C-H bend), alcohol/phenol (O-H stretch), alkyl chloride (C-Cl) and alkyl halide (C-X).

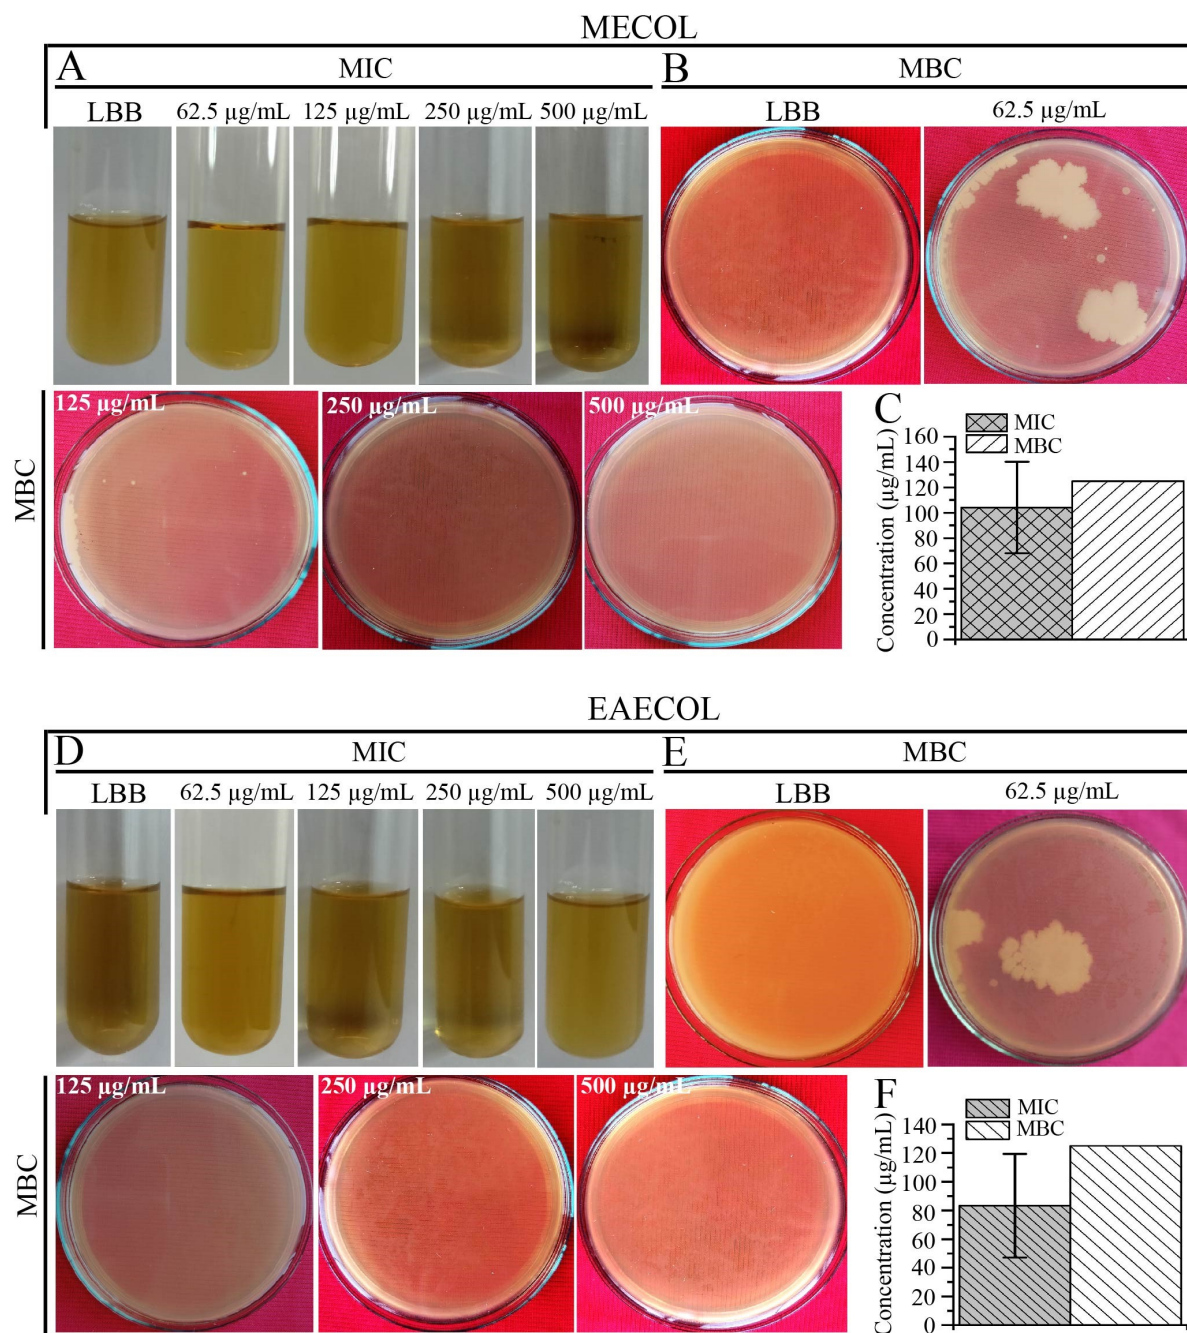

**Figure S4.** The MIC and MBC of MECOL and EAECOL against MDR *Pseudomonas aeruginosa*. The MIC in  $\mu\text{g/mL}$  (A) and the MBC in  $\mu\text{g/mL}$  (B) of MECOL. (C) MECOL demonstrated comparable MIC and MBC against MDR *Pseudomonas aeruginosa*. The MIC in  $\mu\text{g/mL}$  (D) and the MBC in  $\mu\text{g/mL}$  (E) of EAECOL. (F) EAECOL demonstrated comparable MIC and MBC against MDR *Pseudomonas aeruginosa*. The data are represented by the mean

± STD (n = 3). LBB = LB broth; MIC = Minimum inhibitory concentration; MBC = Minimum bactericidal concentration.

**Table S1.** The table presents the GC-MS identified phytochemicals in the MECOL along with their corresponding peak numbers, chemical structures, names, formulas, nature of phytochemicals, compound CID, retention time, and relative area percentage (area%).

| Peak | Chemical Name                                                                                                                                                                       | Nature   | CID     | Retention time | Area% |
|------|-------------------------------------------------------------------------------------------------------------------------------------------------------------------------------------|----------|---------|----------------|-------|
| 1    | <br>1-Decene (C <sub>10</sub> H <sub>20</sub> )                                                    | Alkene   | 13381   | 5.467          | 1.01  |
| 2    | <br>Decane (C <sub>10</sub> H <sub>22</sub> )                                                      | Alkane   | 15600   | 5.561          | 0.75  |
| 3    | <br>D-Limonene (C <sub>10</sub> H <sub>16</sub> )                                                  | Terpenes | 440917  | 5.965          | 1.51  |
| 4    | <br>Hexane, 3,3-dimethyl- (C <sub>8</sub> H <sub>18</sub> )                                      | Alkane   | 11233   | 6.181          | 0.88  |
| 5    | <br>Benzoic acid, methyl ester (Methyl benzoate) (C <sub>8</sub> H <sub>8</sub> O <sub>2</sub> ) | Ester    | 7150    | 6.775          | 2.60  |
| 6    | <br>1-Dodecene (C <sub>12</sub> H <sub>24</sub> )                                                | Alkene   | 8183    | 7.717          | 3.09  |
| 7    | <br>Dodecane (C <sub>12</sub> H <sub>26</sub> )                                                  | Alkane   | 8182    | 7.806          | 1.09  |
| 8    | <br>Dodecane, 4-methyl- (C <sub>13</sub> H <sub>28</sub> )                                       | Alkane   | 521958  | 8.595          | 0.81  |
| 9    | <br>9-Octadecene, (E) (C <sub>18</sub> H <sub>36</sub> )                                         | Alkene   | 5364599 | 9.774          | 3.61  |
| 10   | <br>Tetradecane (C <sub>14</sub> H <sub>30</sub> )                                               | Alkane   | 12389   | 9.846          | 1.66  |

|    |  |                 |          |        |      |
|----|--|-----------------|----------|--------|------|
|    |  | Branched alkane | 35768    | 10.671 | 0.99 |
| 12 |  | Phenolics       | 70825    | 10.882 | 1.79 |
| 13 |  | Alcohol         | 2682     | 11.636 | 3.74 |
| 14 |  | Alcohol         | 91693148 | 11.698 | 2.86 |
| 15 |  | Alkane          | 544055   | 12.7   | 0.78 |
| 16 |  | Alkane          | 8222     | 12.764 | 1.66 |
| 17 |  | Alkene          | 29075    | 13.924 | 1.97 |
| 18 |  | Diterpene       | 10446    | 14.498 | 4.44 |
| 19 |  | Alcohol         | 5366244  | 14.835 | 0.73 |
| 20 |  |                 | 557019   | 15.109 | 1.18 |

|    |                                                                                                     |                   |          |        |      |
|----|-----------------------------------------------------------------------------------------------------|-------------------|----------|--------|------|
| 21 |                    |                   | 12403    | 15.552 | 1.02 |
|    | Heneicosane(C <sub>21</sub> H <sub>44</sub> )                                                       |                   |          |        |      |
| 22 |                    | Alcohol           | 80281    | 16.813 | 1.64 |
|    | n-Nonadecanol-1(C <sub>19</sub> H <sub>40</sub> O)                                                  |                   |          |        |      |
| 23 |                    | Diterpene alcohol | 5280435  | 18.676 | 2.29 |
|    | Phytol(C <sub>20</sub> H <sub>40</sub> O)                                                           |                   |          |        |      |
| 24 |                    | -                 | 12696145 | 28.077 | 1.02 |
|    | Triacontane, 1-iodo-<br>(C <sub>30</sub> H <sub>62</sub> I)                                         |                   |          |        |      |
| 25 |                    | Amide             | 5365371  | 29.313 | 7.53 |
|    | 13-Docosenamide, (Z)-<br>(C <sub>22</sub> H <sub>43</sub> NO)                                       |                   |          |        |      |
| 26 |                    | Branched alkane   | 150931   | 30.078 | 1.10 |
|    | 2-Methylhexacosane (C <sub>27</sub> H <sub>56</sub> )                                               |                   |          |        |      |
| 27 |                  | Ether             | 91693114 | 30.467 | 2.91 |
|    | Dotriacontyl isobutyl ether<br>(C <sub>36</sub> H <sub>74</sub> O)                                  |                   |          |        |      |
| 28 |                  |                   | 292285   | 30.8   | 1.34 |
|    | Octadecane, 3-ethyl-5-(2-ethylbutyl)-<br>(C <sub>26</sub> H <sub>54</sub> )                         |                   |          |        |      |
| 29 |                  | Alkane            | 521846   | 30.98  | 3.85 |
|    | Tetrapentacontane (C <sub>54</sub> H <sub>110</sub> )                                               |                   |          |        |      |
| 30 |                  | Aldehyde          | 984      | 31.035 | 0.65 |
|    | Hexadecanal (C <sub>16</sub> H <sub>32</sub> O)                                                     |                   |          |        |      |
| 31 |                  | Alcohol           | 94042    | 31.13  | 1.04 |
|    | Isophytol, acetate (C <sub>22</sub> H <sub>42</sub> O <sub>2</sub> )                                |                   |          |        |      |
| 32 |                  | Alkene            | 5365022  | 31.284 | 0.81 |
|    | 17-Pentatriacontene (C <sub>35</sub> H <sub>70</sub> )                                              |                   |          |        |      |
| 33 |                  | Alkane            | 91693163 | 31.468 | 1.63 |
|    | Octatriacontyl trifluoroacetate<br>(C <sub>40</sub> H <sub>77</sub> F <sub>3</sub> O <sub>2</sub> ) |                   |          |        |      |

|    |                                                                                                                                                                                                             |                 |          |        |      |
|----|-------------------------------------------------------------------------------------------------------------------------------------------------------------------------------------------------------------|-----------------|----------|--------|------|
| 34 | 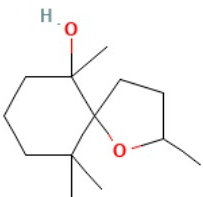 <p>2,6,10,10-Tetramethyl-1-oxaspiro [4.5] decan-6-ol<br/>(C<sub>13</sub>H<sub>24</sub>O<sub>2</sub>)</p>                  | Alkane          | 65428    | 31.635 | 0.65 |
| 35 |  <p>1,1,3,6-tetramethyl-2-(3,6,10,13,14-pentamethyl-3-ethyl-pentadecyl) cyclohexane<br/>(C<sub>32</sub>H<sub>64</sub>)</p> | Aromatic Alkane | 91693134 | 31.841 | 2.36 |
| 36 |  <p>Hexacontane (C<sub>60</sub>H<sub>122</sub>)</p>                                                                        | Alkane          | 24318    | 32.344 | 1.44 |
| 37 |  <p>Vitamin E (C<sub>29</sub>H<sub>50</sub>O<sub>2</sub>)</p>                                                             | Tocopherols     | 14985    | 34.206 | 1.99 |
| 38 |  <p>Fumaric acid, 2-ethylhexyl tridec-2-yn-1-yl Ester (C<sub>25</sub>H<sub>42</sub>O<sub>4</sub>)</p>                    | Ester           | 91701131 | 35.63  | 2.96 |
| 39 |  <p>Tetrapentacontane, 1,54-dibromo- (C<sub>54</sub>H<sub>108</sub>Br<sub>2</sub>)</p>                                   | Alkane          | 545963   | 35.767 | 1.76 |
| 40 |  <p>Z-5-Methyl-6-heneicosen-11-one (C<sub>22</sub>H<sub>42</sub>O)</p>                                                   | Carbonyl Ketone | 5363254  | 36.37  | 2.78 |



|    |                                                                                                                                                                                    |                 |         |        |       |
|----|------------------------------------------------------------------------------------------------------------------------------------------------------------------------------------|-----------------|---------|--------|-------|
| 41 | 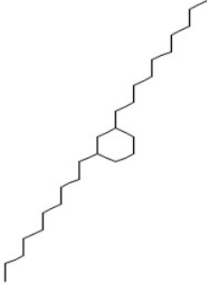 <p>Cyclohexane, 1,3-didecyl-<br/>(C<sub>26</sub>H<sub>52</sub>)</p>                              | Aromatic Alkene | 276893  | 36.393 | 2.33  |
| 42 |  <p>Stigmasterol (C<sub>29</sub>H<sub>48</sub>O)</p>                                              | Steroid         | 5280794 | 37.479 | 10.28 |
| 43 |  <p>E, E, Z-1,3,12-Nonadecatriene-<br/>5,14-diol (C<sub>19</sub>H<sub>34</sub>O<sub>2</sub>)</p> | Alcohol         | 5364768 | 37.845 | 1.47  |
| 44 |  <p>7,8-Epoxy lanostan-11-ol, 3-<br/>acetoxy-(C<sub>32</sub>H<sub>54</sub>O<sub>4</sub>)</p>    | Alcohol         | 541562  | 38.701 | 3.17  |

|    |                                                                                                                                                                       |         |           |        |      |
|----|-----------------------------------------------------------------------------------------------------------------------------------------------------------------------|---------|-----------|--------|------|
| 45 | 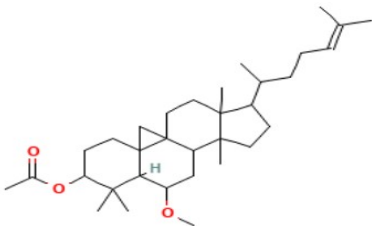 <p>3-O-Acetyl-6-methoxycycloartenol (C<sub>33</sub>H<sub>54</sub>O<sub>3</sub>)</p> | Alcohol | 537607    | 39.217 | 3.31 |
| 46 |  <p>Isocalamenediol (C<sub>21</sub>H<sub>31</sub>N<sub>3</sub>OS)</p>                | Alcohol | 146158381 | 39.61  | 0.97 |

**Table S2.** The table presents the GC-MS identified phytochemicals in the EAECOL, along with their corresponding peak numbers, chemical structures, names, formulas, nature of phytochemicals, Compound CID, retention times, and relative area percentages (%).

| Peak | Name of the Compounds                                                                                                                                                                        | Nature of phytochemicals | Compound CID | Retention time | Area % |
|------|----------------------------------------------------------------------------------------------------------------------------------------------------------------------------------------------|--------------------------|--------------|----------------|--------|
| 1    | 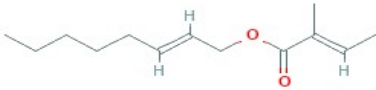 <p>E-2-Octenyl tiglate (C<sub>13</sub>H<sub>22</sub>O<sub>2</sub>)</p>                                   | Ester                    | 5367738      | 8.535          | 0.34   |
| 2    |  <p>Hexane, 3,3-dimethyl- (C<sub>8</sub>H<sub>18</sub>)</p>                                               | Alkane                   | 11233        | 8.594          | 0.52   |
| 3    |  <p>n-Tridecan-1-ol (C<sub>13</sub>H<sub>28</sub>O)</p>                                                   | Alcohol                  | 8207         | 8.87           | 0.26   |
| 4    |  <p>Cyclopropane, 1-methoxy-2,2-dimethyl-3-(3,3-dimethyl-1-propynyl)- (C<sub>12</sub>H<sub>20</sub>O)</p> | Aromatic Alkane          | 596548       | 10.445         | 0.22   |

|    |                                                                                                                                                                                                |           |          |        |      |
|----|------------------------------------------------------------------------------------------------------------------------------------------------------------------------------------------------|-----------|----------|--------|------|
| 5  | 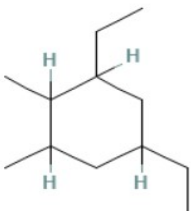 <p>Cyclohexane, 1,5-diethyl-2,3-dimethyl- (C<sub>12</sub>H<sub>24</sub>)</p>                                 | -         | 557905   | 10.615 | 0.52 |
| 6  |  <p>Hexadecane (C<sub>16</sub>H<sub>34</sub>)</p>                                                             | Alkane    | 11006    | 10.667 | 0.74 |
| 7  |  <p>2,5-Difluorobenzoic acid, 5-pentadecyl ester (C<sub>22</sub>H<sub>34</sub>F<sub>2</sub>O<sub>2</sub>)</p> | Ester     | 91716874 | 10.756 | 0.38 |
| 8  |  <p>Phenol, 3,5-bis(1,1-dimethylethyl) (C<sub>14</sub>H<sub>22</sub>O)</p>                                  | Phenolics | 70825    | 10.875 | 0.84 |
| 9  |  <p>n-Nonadecanol-1 (C<sub>19</sub>H<sub>40</sub>O)</p>                                                     | Alcohol   | 80281    | 10.934 | 1.03 |
| 10 |  <p>11-Methyldodecanol (C<sub>13</sub>H<sub>28</sub>O)</p>                                                  | Alcohol   | 33865    | 11.011 | 0.34 |
| 11 |  <p>Eicosane (C<sub>20</sub>H<sub>42</sub>)</p>                                                             | Alkane    | 8222     | 11.076 | 0.32 |
| 12 |  <p>1-Dodecanol, 3,7,11-trimethyl- (C<sub>15</sub>H<sub>32</sub>O)</p>                                      | Alcohol   | 138824   | 11.177 | 0.45 |

|    |                                                                                                                                                                         |          |         |        |      |
|----|-------------------------------------------------------------------------------------------------------------------------------------------------------------------------|----------|---------|--------|------|
| 13 | 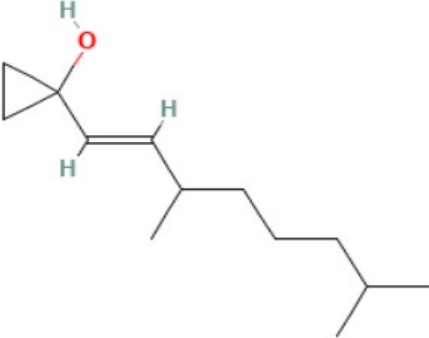 <p>Cyclopropanol, 1-(3,7-dimethyl-1-octenyl)- (C<sub>13</sub>H<sub>24</sub>O)</p>     | Alcohol  | 5367736 | 11.27  | 0.26 |
| 14 |  <p>Benzene, (1-methylnonyl)- (C<sub>16</sub>H<sub>26</sub>)</p>                      | Carbonyl | 20659   | 11.775 | 0.26 |
| 15 |  <p>6-Ethoxy-6-methyl-2-cyclohexenone (C<sub>9</sub>H<sub>14</sub>O<sub>2</sub>)</p> | Ketone   | 537457  | 11.975 | 1.12 |
| 16 |  <p>Benzene, (1-pentylhexyl)- (C<sub>17</sub>H<sub>28</sub>)</p>                     | Carbonyl | 20660   | 12.025 | 1.00 |

17 Carbonyl 20661 12.063 1.06

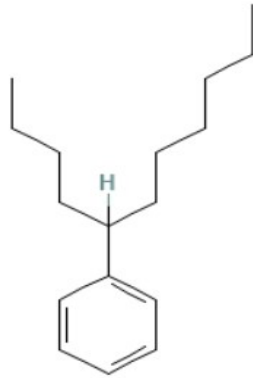

Benzene, (1-butylheptyl)- (C<sub>17</sub>H<sub>28</sub>)

18 Carbonyl 20654 12.182 0.91

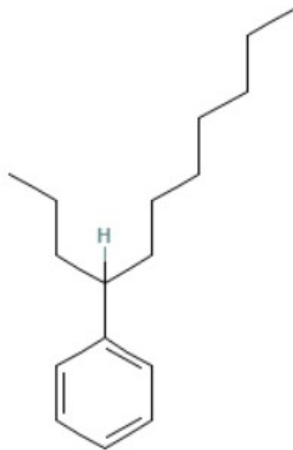

Benzene, (1-propyloctyl)- (C<sub>17</sub>H<sub>28</sub>)

19 Ester 102861 12.278 0.29

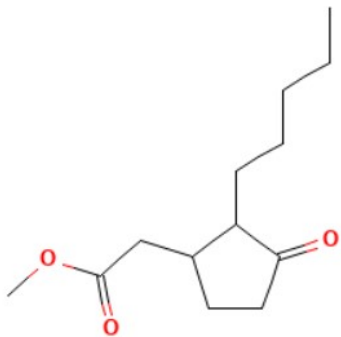

Cyclopentaneacetic acid, 3-oxo-2-pentyl-, methyl ester (Methyl dihydrojasmonate) (C<sub>13</sub>H<sub>22</sub>O<sub>3</sub>)

20 Carbohydrates 8973 12.532 9.43

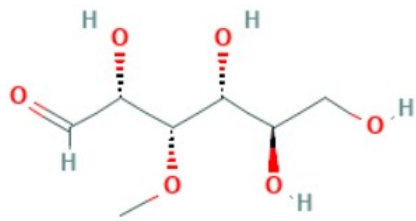

O-Methyl-d-glucose (C<sub>7</sub>H<sub>14</sub>O<sub>6</sub>)

|    |                                                                                                                                                                                                                                                      |              |        |        |      |
|----|------------------------------------------------------------------------------------------------------------------------------------------------------------------------------------------------------------------------------------------------------|--------------|--------|--------|------|
| 21 | 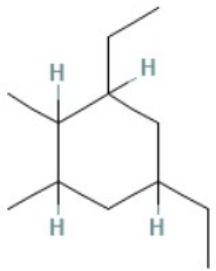 <p>Cyclohexane,1,5-diethyl-2,3-dimethyl- (C<sub>12</sub>H<sub>24</sub>)</p>                                                                                        | Alkane       | 557905 | 12.693 | 0.95 |
| 22 |  <p>2-Butyloxycarbonyloxy-1,1,10-trimethyl-6,9-epidioxydecalin (C<sub>18</sub>H<sub>30</sub>O<sub>5</sub>)</p>                                                      | -            | 384923 | 12.742 | 0.88 |
| 23 |  <p>2(3H)-Naphthalenone,4,4a,5,6,7,8-hexahydro-4a-methyl- (4a-Methyl-6-(3-oxobutyl)-4,4a,5,6,7,8-hexahydronaphthalen-2(3H)-one) (C<sub>11</sub>H<sub>16</sub>O)</p> | Ketone       | 136654 | 12.818 | 0.55 |
| 24 |  <p>Benzene, (1-methyldecyl)- (C<sub>17</sub>H<sub>28</sub>)</p>                                                                                                  | Carbonyl     | 20656  | 12.876 | 0.68 |
| 25 |  <p>Ethanol, 2-(tetradecyloxy)- (C<sub>16</sub>H<sub>34</sub>O<sub>2</sub>)</p>                                                                                   | Alcohol      | 16491  | 12.99  | 1.06 |
| 26 |  <p>Methyl tetradecanoate (C<sub>15</sub>H<sub>30</sub>O<sub>2</sub>)</p>                                                                                         | Methyl ester | 31284  | 13.024 | 1.04 |

|    |                                                                                                                                                  |              |        |        |      |
|----|--------------------------------------------------------------------------------------------------------------------------------------------------|--------------|--------|--------|------|
| 27 | 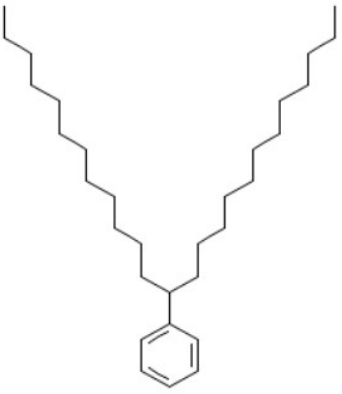 <p>Pentacosane, 13-phenyl- (<math>C_{31}H_{56}</math>)</p>     | Fatty Alkane | 138643 | 13.114 | 1.44 |
| 28 |  <p>Benzene, (1-butyloctyl)- (<math>C_{18}H_{30}</math>)</p>   | Carbonyl     | 17630  | 13.175 | 0.69 |
| 29 |  <p>Benzene, (1-propylnonyl)- (<math>C_{18}H_{30}</math>)</p> | Carbonyl     | 17631  | 13.346 | 0.63 |
| 30 |  <p>1-Decanol, 2-hexyl- (<math>C_{16}H_{34}O</math>)</p>      | Alcohol      | 95337  | 13.465 | 0.54 |

|    |                                                                                     |                       |         |        |       |
|----|-------------------------------------------------------------------------------------|-----------------------|---------|--------|-------|
| 31 | 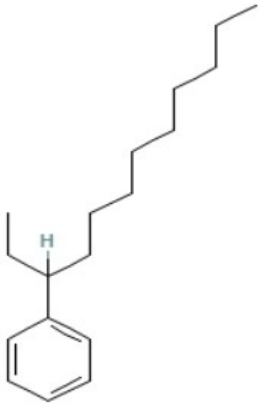   | Carbonyl              | 16979   | 13.65  | 0.23  |
| 32 |    | Ketone                | 14334   | 13.885 | 0.41  |
| 33 |  | Natural phenol        | 520869  | 14.343 | 0.78  |
| 34 |  | Aliphatic hydrocarbon | 557019  | 14.483 | 0.60  |
| 35 |  | Carboxylic ester      | 8181    | 15.736 | 21.00 |
| 36 |  | Carboxylic ester      | 5284421 | 18.385 | 7.05  |



|    |                                                                                                                                                                                  |                         |         |        |       |
|----|----------------------------------------------------------------------------------------------------------------------------------------------------------------------------------|-------------------------|---------|--------|-------|
| 37 | 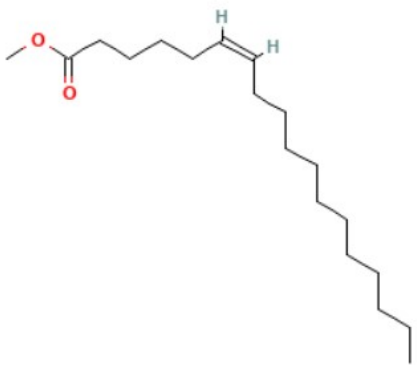 <p>6-Octadecenoic acid, methyl ester,<br/>(Z)- (C<sub>19</sub>H<sub>36</sub>O<sub>2</sub>)</p> | Carboxylic ester        | 5362717 | 18.487 | 23.39 |
| 38 |  <p>Phytol (C<sub>20</sub>H<sub>40</sub>O)</p>                                                  | Diterpene alcohol       | 5280435 | 18.653 | 4.61  |
| 39 |  <p>Methyl stearate (C<sub>19</sub>H<sub>38</sub>O<sub>2</sub>)</p>                             | Fatty acid methyl ester | 8201    | 18.906 | 2.35  |
| 40 |  <p>13-Docosenamide, (Z)- (C<sub>22</sub>H<sub>43</sub>NO)</p>                                 | Amide                   | 5365371 | 29.292 | 5.24  |
| 41 |  <p>Stigmasterol (C<sub>29</sub>H<sub>48</sub>O)</p>                                          | Steroid                 | 5280794 | 36.365 | 1.60  |
| 42 |  <p>ChondrillasterolF (C<sub>29</sub>H<sub>48</sub>O)</p>                                     | Steroid                 | 5283663 | 37.461 | 2.47  |

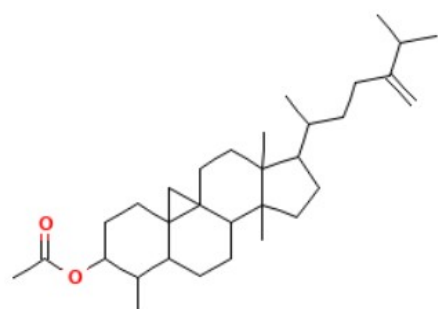

9, 19-Cycloergost-24(28)-en-3-ol, 4,  
14-dimethyl-, acetate, (3. beta. 4.  
alpha., 5. alpha.)- ( $C_{32}H_{52}O_2$ )

Ester

537081

39.189

1.51

**Table S3.** The table presents the phytochemical compounds that have been identified by GC-MS analysis and found to be commonly present in both MECOL and EAECOL.

| SN | Name                                                                                                                                           | CID     | Nature                    | Peak  | MECOL Retention time | Area % | Peak | EAECOL Retention time | Area % |
|----|------------------------------------------------------------------------------------------------------------------------------------------------|---------|---------------------------|-------|----------------------|--------|------|-----------------------|--------|
| 1  | <br>Hexane, 3,3-dimethyl ( $C_8H_{18}$ )                      | 11233   | Hydrocarbon               | 4     | 6.181                | 0.88   | 2    | 8.594                 | 0.52   |
| 2  | <br>Phenol, 3,5-bis(1,1-dimethylethyl)- ( $C_{14}H_{22}O$ ) | 70825   | Phenolic                  | 12    | 10.882               | 1.79   | 8    | 10.875                | 0.84   |
| 3  | <br>Eicosane ( $C_{20}H_{42}$ )                             | 8222    | Alkane                    | 16/21 | 12.764               | 1.66   | 11   | 11.076                | 0.32   |
| 4  | <br>n-Nonadecanol ( $C_{19}H_{40}O$ )                       | 80281   | Long-chain fatty alcohol  | 22    | 16.813               | 1.64   | 9    | 10.934                | 1.03   |
| 5  | <br>Phytol ( $C_{20}H_{40}O$ )                              | 5280435 | Acyclic diterpene alcohol | 23/28 | 18.676               | 2.29   | 38   | 18.653                | 4.61   |
| 6  | <br>13-Docosamide, (Z)- ( $C_{22}H_{43}NO$ )                | 5365371 | Amide                     | 25    | 29.313               | 7.53   | 40   | 29.292                | 5.24   |

|                                                     |                                                                                   |         |                                 |    |        |       |    |        |      |
|-----------------------------------------------------|-----------------------------------------------------------------------------------|---------|---------------------------------|----|--------|-------|----|--------|------|
| 7                                                   | 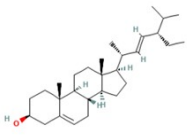 | 5280794 | Unsaturated<br>phytosterol<br>1 | 43 | 37.479 | 10.18 | 41 | 36.365 | 1.60 |
| Stigmasterol<br>(C <sub>29</sub> H <sub>48</sub> O) |                                                                                   |         |                                 |    |        |       |    |        |      |

**Table S4.** The table displays the XP Glide docking results of various phytochemicals with the LasR receptor in *P. aeruginosa*. The docking analysis provides valuable insights into the potential interactions and binding affinities of the phytochemicals with the LasR receptor.

| SN | PubChem Identifier           | Compounds                                              | Docking score              | XPG Score                 |
|----|------------------------------|--------------------------------------------------------|----------------------------|---------------------------|
| 1  | CID 5363254                  | Z-5-Methyl-6-heneicosen-11-one                         | -8.01                      | -8.01                     |
| 2  | CID 91716874                 | 2,5-Difluorobenzoic acid, 5-pentadecyl                 | -7.553                     | -7.553                    |
| 3  | CID 8973                     | 3-O-Methyl-d-glucose                                   | -6.671                     | -6.672                    |
| 4  | CID 91701131                 | Fumaric acid, 2-ethylhexyl tridec-2-yn-1-yl ester      | -6.288                     | -6.288                    |
| 5  | CID 102861                   | Methyl dihydrojasmonate                                | -5.923                     | -5.923                    |
| 6  | CID 7150                     | Methyl benzoate                                        | -5.811                     | -5.811                    |
| 7  | CID 557905                   | 1,5-Diethyl-2,3-dimethylcyclohexane                    | -5.513                     | -5.513                    |
| 8  | CID 136654                   | 4a-Methyl-4,4a,5,6,7,8-hexahydro-2(3H)-                | -5.472                     | -5.472                    |
| 9  | CID 5364768                  | E, E, Z-1,3,12-Nonadecatriene-5,14-diol                | -5.459                     | -5.459                    |
| 10 | CID 5365371                  | 13-Docosenamide, (Z)-                                  | -5.421                     | -5.421                    |
| 11 | CID 94042                    | 1,5,9,13-Tetramethyl-1-vinyltetradecyl                 | -5.417                     | -5.417                    |
| 12 | CID 138824                   | 3,7,11-Trimethyl-1-dodecanol                           | -5.139                     | -5.139                    |
| 13 | CID16491                     | 2-(Tetradecyloxy)ethanol                               | -5.136                     | -5.136                    |
| 14 | CID 3246941<br>(LasR Native) | N-3-Oxo-Dodecanoyl-L-Homoserine<br>Lactone (redocking) | -5.375<br>-5.125<br>-5.475 | -5.313<br>-5.11<br>-5.275 |

**Table S5.** Free energy of ligand binding to LasR obtained from post-docking MM-GBSA analysis

| Phytochemical Identifier | MM-GBSA (kcal/mol) | MM-GBSA (kcal/mol) Bind Coulomb | $\Delta$ GBind H-bond | MMGBSA $\Delta$ G Bind Lipo | MMGBSA $\Delta$ G Bind vdW |
|--------------------------|--------------------|---------------------------------|-----------------------|-----------------------------|----------------------------|
| CID 91701131             | -40.23             | -1.61                           | 0                     | -30.31                      | -17.65                     |
| CID 5365371              | -47.19             | -0.19                           | 0                     | -34.63                      | -16.29                     |
| CID 5363254              | -39.52             | 1.37                            | 0                     | -30.95                      | -13.13                     |

|                         |        |       |       |        |        |
|-------------------------|--------|-------|-------|--------|--------|
| CID 138824              | -23.06 | -0.24 | 0     | -15.91 | -8.31  |
| CID 91716874            | -12.71 | -0.92 | 0     | -28.65 | -12.71 |
| CID 94042               | -18.05 | -0.43 | 0     | -27.42 | -11.9  |
| CID 16491               | -31.77 | -1.31 | 0     | -24.56 | -11.13 |
| CID 5364768             | -36.41 | -0.09 | 0     | -28.25 | -13.16 |
| CID 557905              | -16.01 | -0.03 | 0     | -14.36 | -8.06  |
| CID 102861              | -24.49 | -2.18 | -0.12 | -18.67 | -10.48 |
| CID 7150                | -14.2  | -0.15 | -0.14 | -6.95  | -9.28  |
| CID 8973                | -18.62 | 3.61  | 0     | -9.19  | -9.44  |
| CID 136654              | -20.78 | -3.37 | 0     | -15.86 | -9.09  |
| CID 3246941<br>(Native) | -13.9  | -1.09 | -0.08 | -4.95  | -8.05  |

**Table S6.** This table presents the pharmacokinetics (ADME) and toxicity (T) characteristics of the 12 most interactive phytochemicals. The symbols "+" and "-" represent the presence and absence of specific features, respectively. "NI" stands for Noninhibitor, "NS" for Non-substrate, and "S" for substrate. And M for moderate. Additionally, "H" denotes High, "L" represents Low, "A" indicates Active, and "I" stands for Inactive.

| SN | Compound<br>CID | Absorption |                    | Metabolism          |    |    |                     |    |    | Excretion                             | Toxicity       |                 |              |                |              | Rat<br>LD <sub>50</sub><br>value<br>(mg/<br>kg) |
|----|-----------------|------------|--------------------|---------------------|----|----|---------------------|----|----|---------------------------------------|----------------|-----------------|--------------|----------------|--------------|-------------------------------------------------|
|    |                 | HIA        | BBB<br>penetration | CYP450<br>inhibitor |    |    | CYP450<br>substrate |    |    | Renal<br>clearance<br>(ml/m<br>in/kg) | Hepatotoxicity | Carcinogenicity | Mutagenicity | Immunogenicity | Cytotoxicity |                                                 |
| 1  | 536325<br>4     | L          | No                 | NI                  | NI | NI | NS                  | NS | NS | M                                     | I              | I               | I            | I              | I            | 1500<br>0                                       |
| 2  | 8973            | L          | No                 | NI                  | NI | NI | NS                  | NS | NS | Low                                   | I              | I               | I            | I              | I            | 2000<br>0                                       |
| 3  | 917011<br>31    | H          | No                 | NI                  | NI | NI | NS                  | NS | S  | M                                     | I              | A               | I            | I              | I            | 386                                             |
| 4  | 102861          | H          | Yes                | NI                  | NI | NI | NS                  | NS | NS | M                                     | I              | I               | I            | I              | I            | 5000                                            |
| 5  | 7150            | H          | Yes                | NI                  | NI | NI | NS                  | NS | NS | M                                     | I              | I               | I            | I              | I            | 1177                                            |
| 6  | 557905          | L          | Yes                | NI                  | NI | NI | NS                  | NS | NS | M                                     | I              | I               | I            | I              | I            | 1538<br>0                                       |
| 7  | 136654          | H          | Yes                | NI                  | NI | NI | NS                  | NS | NS | M                                     | I              | I               | I            | I              | I            | 2450                                            |
| 8  | 536476          | H          | Yes                | NI                  | NI | NI | NS                  | NS | NS | M                                     | A              | I               | I            | I              | I            | 2100                                            |

|    |        |   |     |    |    |    |    |    |    |     |   |   |   |   |   |      |
|----|--------|---|-----|----|----|----|----|----|----|-----|---|---|---|---|---|------|
| 9  | 536537 | L | No  | NI | NI | NI | S  | NS | NS | Low | I | I | I | I | I | 750  |
| 10 | 94042  | L | No  | NI | NI | NI | S  | NS | S  | Low | I | I | I | I | I | 850  |
| 11 | 138824 | H | Yes | NI | NI | NI | NS | NS | NS | M   | I | I | I | I | I | 1000 |
| 12 | 16491  | H | Yes | NI | NI | NI | NS | NS | NS | M   | I | A | I | I | I | 2280 |

**Table S7.** This table provides the drug-ability profile of the 12 most interactive phytochemicals. “MW” stands for molecular weight, “HBA” for hydrogen bond acceptor, “HBD” for hydrogen bond donor, “TPSA” for topological surface area, and RB for rotatable bonds.

| SN | Compound CID | Drug-ability profile |                            |            |             |                        |           |                           |                                |                                         |                               |
|----|--------------|----------------------|----------------------------|------------|-------------|------------------------|-----------|---------------------------|--------------------------------|-----------------------------------------|-------------------------------|
|    |              | MW (g/mol)           | Physicochemical properties |            |             | TPSA (Å <sup>2</sup> ) | No. of RB | Lipophilicity (cLOG Po/w) | Water solubility [LogS (ESOL)] | Lipinski's Rule of Five (RO5) violation | Synthetic accessibility score |
|    |              |                      | No. of HB A                | No. of HBD | Heavy atoms |                        |           |                           |                                |                                         |                               |
| 1  | 5363254      | 322.57               | 1                          | 0          | 23          | 17.07                  | 17        | 5.58                      | -6.12                          | 1                                       | 4.23 (Easy)                   |
| 2  | 8973         | 194.18               | 6                          | 4          | 13          | 107.2                  | 6         | -2.56                     | 1.17                           | 1                                       | 3.52 (Easy)                   |
| 3  | 91701131     | 406.60               | 4                          | 0          | 29          | 52.6                   | 19        | 5                         | -6.61                          | 1                                       | 5.46 (Moderately easy)        |
| 4  | 102861       | 226.31               | 3                          | 0          | 16          | 43.37                  | 7         | 2.04                      | -2.46                          | 0                                       | 2.91 (Easy)                   |
| 5  | 7150         | 136.15               | 2                          | 0          | 10          | 26.3                   | 2         | 1.93                      | -2.33                          | 0                                       | 1 (Very easy)                 |
| 6  | 557905       | 168.32               | 0                          | 0          | 12          | 0.0                    | 2         | 5                         | -4.12                          | 1                                       | 3.09 (Easy)                   |
| 7  | 136654       | 164.24               | 1                          | 0          | 12          | 17.07                  | 0         | 2.49                      | -2.4                           | 0                                       | 3.23 (Easy)                   |
| 8  | 5364768      | 294.47               | 2                          | 2          | 21          | 40.46                  | 14        | 3.39                      | -4.41                          | 0                                       | 4.49 (Easy)                   |
| 9  | 5365371      | 337.58               | 1                          | 1          | 24          | 43.09                  | 19        | 5.06                      | -6.45                          | 1                                       | 3.44 (Easy)                   |
| 10 | 94042        | 338.57               | 2                          | 0          | 24          | 26.3                   | 15        | 5.47                      | -6.25                          | 1                                       | 4.09 (Easy)                   |
| 11 | 138824       | 228.41               | 1                          | 1          | 16          | 20.23                  | 10        | 4.2                       | -4.39                          | 1                                       | 2.89 (Easy)                   |
| 12 | 16491        | 258.44               | 2                          | 1          | 18          | 29.46                  | 15        | 3.53                      | -4.35                          | 0                                       | 3.01 (Easy)                   |

**Table 8.** This table presents the molecular docking interactions and the interacting residues of the LasR quorum sensing protein with the best phytochemical compounds and native ligands from specific docked complexes.

| Compounds                                                                  | Docking Score (Kcal/mol) | H-Bond with LasR | Other interaction LasR                                                                                                                                                                                               |
|----------------------------------------------------------------------------|--------------------------|------------------|----------------------------------------------------------------------------------------------------------------------------------------------------------------------------------------------------------------------|
| Methyl dihydrojasmonate (CID 102861)                                       | -5.923                   | TYR56, ASP73     | LEU36, GLY38, LEU39, LEU40, TYR47, ALA50, ILE52, ARG61, TYR64, ASP65, ALA70, THR75, VAL76, CYS79, THR80, THR115, LEU125, GLY126, ALA127, SER229                                                                      |
| Methyl benzoate (CID 7150)                                                 | -5.811                   | TYR56, SER129    | LEU36, TRP60, TYR64, ASP73, THR75, VAL76, TRP88, TYR93, PHE101, ALA105, LEU110, THR115, ALA127                                                                                                                       |
| 4a-Methyl-4,4a,5,6,7,8-hexahydro-2(3H)-naphthalene (CID 136654)            | -5.472                   | -                | LEU36, GLY38, LEU39, LEU40, TYR47, ALA50, ILE52, ARG61, TYR64, ASP65, ALA70, CYS79, VAL76, LEU125, GLY126, ALA127                                                                                                    |
| N-3-Oxo-Dodecanoyl-L-Homoserine Lactone (CID 3246941) LasR native compound | -5.375                   | TRP60            | LEU36, GLY38, LEU39, LEU40, TRY47, ALA50, ILE52, TYR56, ARG61, TYR64, ASP65, ALA70, ASP73, THR75, VAL76, CYS79, THR80, TRP88, TYR93, PHE101, PHE102, ALA105, LEU110, THR115, LEU125, GLY126, ALA127, SER129, SER 131 |

**Table 9.** This table showcases the additional molecular docking interactions of the LpxC lipid A biosynthesis protein with the best phytochemical compounds and the native ligand, enabling a comprehensive analysis of the phytochemicals' multi-targeting capabilities.

| SN | PubChem identifier               | Compounds                                                                    | Docking score | XP GScore |
|----|----------------------------------|------------------------------------------------------------------------------|---------------|-----------|
| 1  | CID 9823454 (LpxC native ligand) | (2R)-N-hydroxy-3-naphthalen-2-yl-2-(naphthalen-2-ylsulfonylamino)propanamide | -4.604        | -4.619    |
| 2  | CID 102861                       | Methyl dihydrojasmonate                                                      | -4.772        | -4.772    |
| 3  | CID 136654                       | Methyl benzoate                                                              | -4.688        | -4.688    |
| 4  | CID 7150                         | 4a-Methyl-4,4a,5,6,7,8-hexahydro-2(3H)-naphthalene                           | -3.505        | -3.505    |
